# Supplementary material for: Bacterial Community Characteristics Shaped by Artificial Environmental PM2.5 Control in Intensive Broiler Houses
Source: MDPI journal article supplement (doi:10.3390/ijerph20010723), 2022-12-30
Supplement: s1 [file s1]

Supplementary Materials:

Figure S1: The relative abundance of airborne bacteria at the phylum level inside and outside the house.

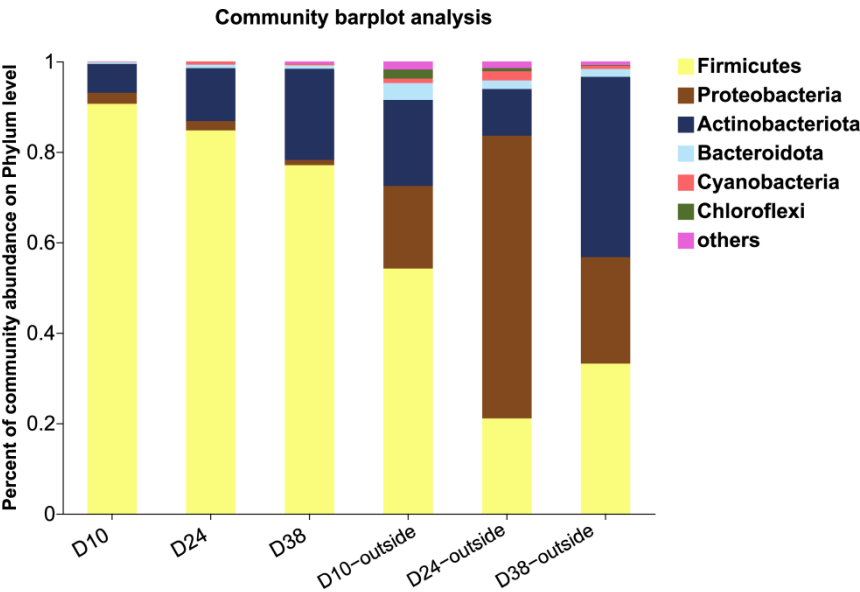

Figure S2: The ternary phase diagram of indoor bacteria.

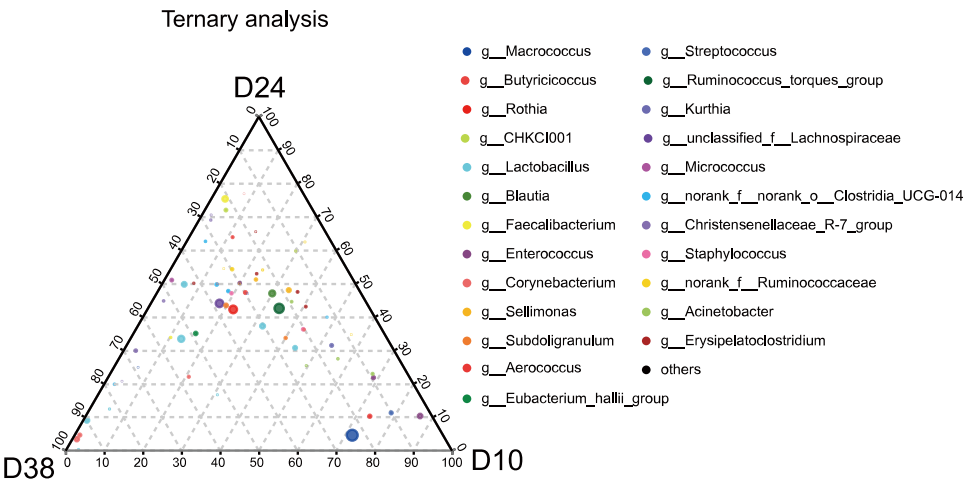

Figure S3: LEfSe hierarchical tree diagram of multi-level species of indoor bacteria.

## Cladogram

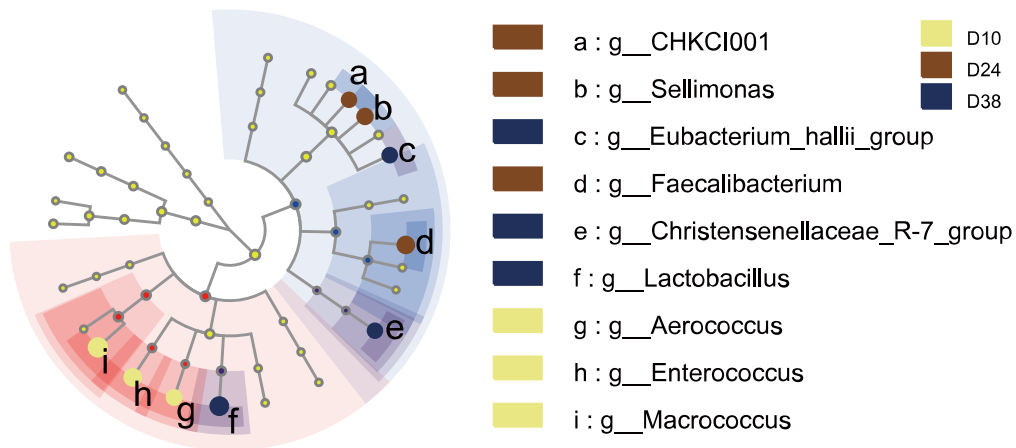

Figure S4: The relative abundance of manurial and indoor airborne bacteria at the phylum level.

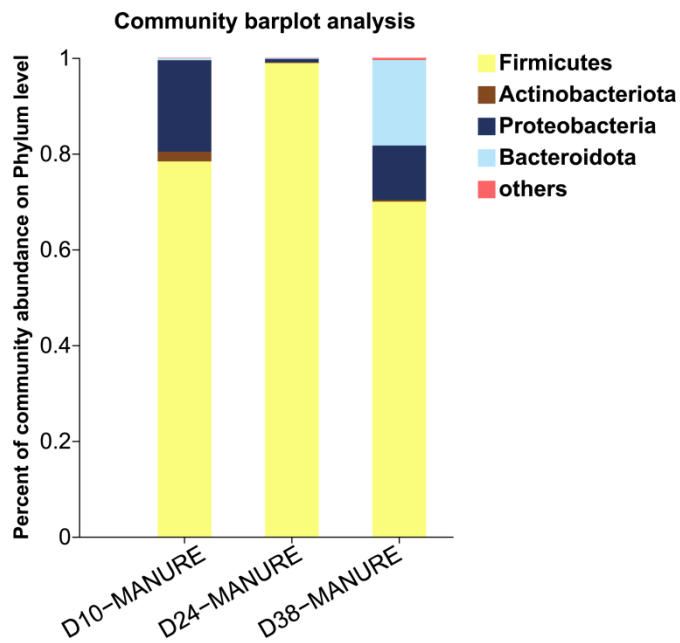

Table S1: Related data table of db-RDA.

|                 | CAP1    | CAP2    | R <sup>2</sup> | P_values |
|-----------------|---------|---------|----------------|----------|
| PM2.5           | -0.6396 | 0.7687  | 0.9516         | 0.003    |
| Temp            | -0.9602 | 0.2793  | 0.9163         | 0.005    |
| Hum             | 0.7915  | -0.6112 | 0.9279         | 0.003    |
| NH <sub>3</sub> | -0.9321 | 0.3621  | 0.9220         | 0.007    |
| CO <sub>2</sub> | -0.9126 | 0.4088  | 0.9577         | 0.001    |
| Wind            | 0.9353  | -0.3537 | 0.8946         | 0.010    |
